# Supplementary material
Source: PubMed Central journal article supplement (PMC2913193)
Supplement: mmc1.pdf [file mmc1.pdf]

Biophysical Journal, Volume 99

**Supporting Material**

**Experimental evolution of adenylate kinase reveals contrasting strategies towards protein thermostability**

Corwin Miller, Milya Davlieva, Corey J. Wilson, Kristopher I. White, Rafael Counago, Gang Wu, Jeffrey C. Myers, Pernilla Wittung-Stafshede, and Yousif Shamoo

## Supplementary Information

"Experimental evolution of adenylate kinase reveals contrasting strategies towards protein thermostability"

Corwin Miller, Milya Davlieva, Corey Wilson, Kristopher I. White, Rafael Couñago, Gang Wu, Jeffrey C. Myers, Pernilla Wittung-Stafshede and Yousif Shamoo

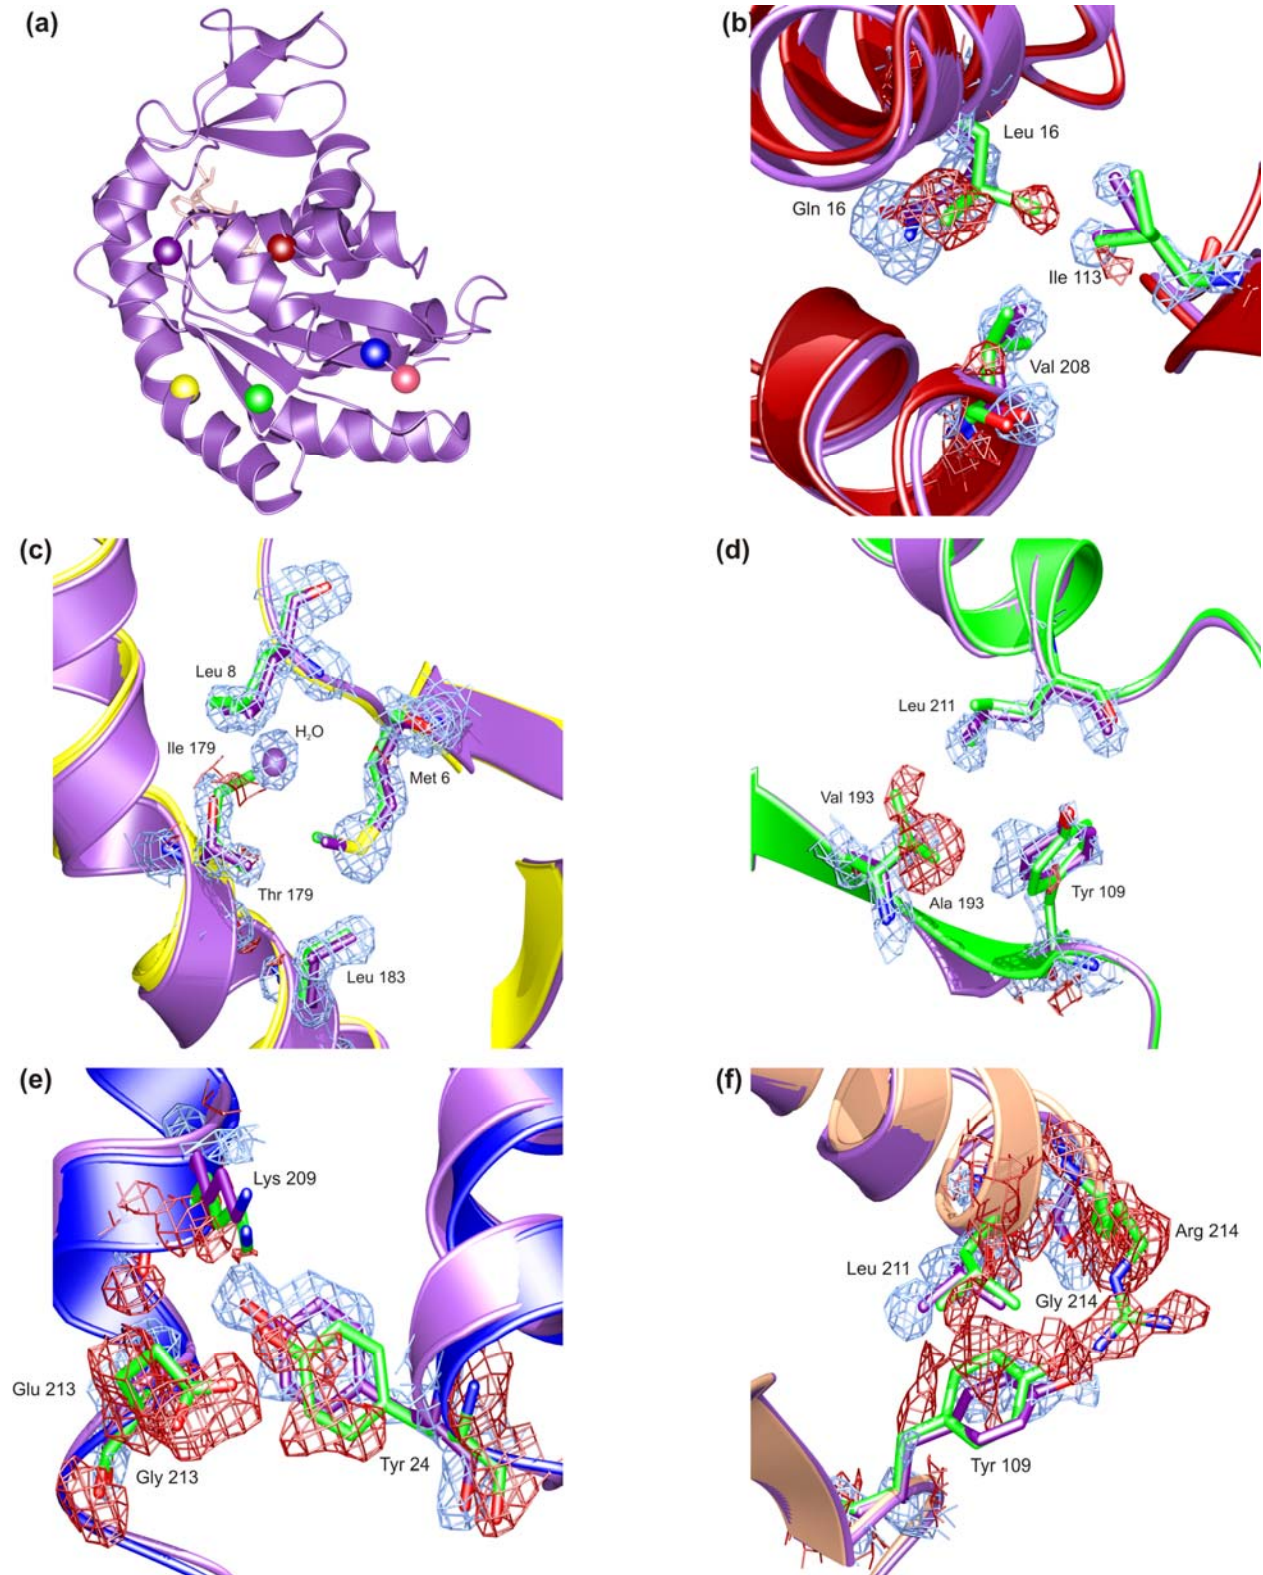

**Supplementary Figure 1.** Crystallographic analysis of adaptive AK<sub>BSUB</sub> mutations at 1.8 Å resolution. (a) Secondary structure of AK<sub>BSUB</sub> with the positions of mutations indicated as colored spheres: AK<sub>BSUB</sub>Q199R/Q16L (red); AK<sub>BSUB</sub>Q199R/T179I (yellow); AK<sub>BSUB</sub>Q199R/A193V (green); AK<sub>BSUB</sub>Q199R/G213E (blue) and AK<sub>BSUB</sub>Q199R/G214R (orange). Secondary structure elements are labeled using the convention described by Bae and Phillips (2004)(1). (b-f) 2Fo-Fc difference density (2Fo-Fc AK<sub>BSUB</sub> double mutant – 2Fo-Fc AK<sub>BSUB</sub> Q199R) electron density maps covering the residues immediately surrounding the sites of each double mutant are shown in each panel. Positive density (blue). Negative density (red). The amino acids found originally in AK<sub>BSUB</sub>Q199R are shown as purple sticks. (b) AK<sub>BSUB</sub>Q199R/Q16L has excellent packing in a non-polar pocket made up of Leu-5, Ile-20, Ile-111, Ile-113, Val-204, Tyr-205 and Ala-206 (1.4 σ); (c) AK<sub>BSUB</sub>Q199R/T179I displaces a water and packs into a non-polar pocket comprised of Met-6, Gly-7 and Leu-8 (1.4 σ); (d) AK<sub>BSUB</sub>Q199R/A193V is at a largely solvent exposed position. Leu-211 and Tyr-109 are displaced slightly to form a pocket (1.9 σ); (e) AK<sub>BSUB</sub>Q199R/G213E is in a highly solvent exposed position and may form a new electrostatic network made up of between Lys-209↔Glu-213↔Lys-216 along the solvent exposed face of the C-terminal helix-9 as well as Asp-23 from helix-1 (1.7 σ); and (f) AK<sub>BSUB</sub>Q199R/G214R forms a new hydrogen bond to Tyr-109 potentially tethering the C-terminal helix to the core of the protein (1.3 σ).

**Supplementary Table 1. Data collection and refinement statistics for AK<sub>BSUB</sub> mutants**

| <b>Data collection</b>                            | <b>Q199R/Q16L</b>                           | <b>Q199R/T179I</b>                    | <b>Q199R/A193V</b>                         | <b>Q199R/G213E</b>                         | <b>Q199R/G214R</b>                            |
|---------------------------------------------------|---------------------------------------------|---------------------------------------|--------------------------------------------|--------------------------------------------|-----------------------------------------------|
| Wavelength (Å)                                    | 1.5418                                      | 1.5418                                | 1.5418                                     | 1.5418                                     | 1.5418                                        |
| Resolution (Å)                                    | 20.0-1.8                                    | 30.4-1.8                              | 20.0-1.8                                   | 29.7-1.8                                   | 27.0-1.8                                      |
| Space group                                       | P2 <sub>1</sub>                             | P2 <sub>1</sub>                       | P2 <sub>1</sub>                            | P2 <sub>1</sub>                            | P2 <sub>1</sub> 2 <sub>1</sub> 2 <sub>1</sub> |
| Molecules per a.u.                                | 2                                           | 2                                     | 2                                          | 2                                          | 1                                             |
| Unit Cell (Å)                                     | a =34.6<br>b = 74.3<br>c = 77.4<br>β=100.2° | a=34.8<br>b=75.8<br>c=77.5<br>β=98.2° | a =34.7<br>b = 75.1<br>c = 77.5<br>β=98.6° | a =34.7<br>b = 75.5<br>c = 77.6<br>β=98.9° | a=44.0<br>b=45.5<br>c=100.2<br>α=β=γ=90.0°    |
| Unique reflections                                | 34,813                                      | 34,509                                | 49,183                                     | 34,668                                     | 17,928                                        |
| Completeness (%) <sup>a</sup>                     | 96.1 (90.1)                                 | 93.4 (84.7)                           | 94.8 (93.1)                                | 94.7 (93.9)                                | 95.8(92.2)                                    |
| R <sub>merge</sub> (%) <sup>b</sup>               | 5.7 (44.7)                                  | 2.1 (7.4)                             | 5.2 (15.0)                                 | 5.7 (28.3)                                 | 3.2(10.4)                                     |
| <b>Refinement</b>                                 |                                             |                                       |                                            |                                            |                                               |
| R <sub>work</sub> /R <sub>free</sub> <sup>c</sup> | 24.5/26.4                                   | 19.7/24.5                             | 22.8/26.89                                 | 22.7/27.3                                  | 19.8/23.9                                     |
| r.m.s.d.                                          |                                             |                                       |                                            |                                            |                                               |
| bonds (Å)/angles (°)                              | 0.010/1.40                                  | 0.005/1.22                            | 0.008/1.40                                 | 0.005/1.20                                 | 0.008/1.40                                    |
| Average B-factors (Å <sup>2</sup> )               |                                             |                                       |                                            |                                            |                                               |
| main chain (A/B)                                  | 23.7/25.6                                   | 15.3/13.4                             | 17.4/18.7                                  | 20.0/21.9                                  | 19.7                                          |
| overall (A/B)                                     | 27.5/26.9                                   | 16.8/15.0                             | 18.7/20.0                                  | 21.2/23.3                                  | 21.8                                          |
| Ramachandran <sup>d</sup>                         |                                             |                                       |                                            |                                            |                                               |
| favored (%)                                       | 93.1                                        | 95.0                                  | 95.3                                       | 93.7                                       | 96.2                                          |
| disallowed (%)                                    | 0.0                                         | 0.0                                   | 0.0                                        | 0.0                                        | 0.0                                           |
| <b>PDB Accession Number</b>                       | 2osb                                        | 2oo7                                  | 2ori                                       | 2qaj                                       | 2p3s                                          |

<sup>a</sup> Parenthesis are values for highest resolution shell.

<sup>b</sup>  $R_{\text{merge}} = \sum |I - \langle I \rangle| / \sum I$ , where  $I$  is measured intensity for reflections with indices  $hkl$ .

<sup>c</sup>  $R_{\text{work}} = \sum |F_o - F_c| / \sum |F_o|$  for all data with  $F_o > 2 \sigma(F_o)$  excluding data to calculate  $R_{\text{free}}$  and  $R_{\text{free}} = \sum |F_o - F_c| / \sum |F_o|$ , for all data with  $F_o > 2 \sigma(F_o)$  excluded from refinement.

<sup>d</sup> Calculated by using PROCHECK (2)

| Supplementary Table 2. Comparison of AK <sub>BSUB</sub> Mutant Structures                 |                  |                           |                            |                            |                            |                 |
|-------------------------------------------------------------------------------------------|------------------|---------------------------|----------------------------|----------------------------|----------------------------|-----------------|
|                                                                                           | Q199R<br>(A / B) | Q199R/<br>Q16L<br>(A / B) | Q199R/<br>T179I<br>(A / B) | Q199R/<br>A193V<br>(A / B) | Q199R/<br>G213E<br>(A / B) | Q199R/<br>G214R |
| Average main-chain B-factors (Å <sup>2</sup> )                                            | 11.8/13.4        | 23.7/25.6                 | 15.3/13.4                  | 17.4/18.7                  | 20.0/21.9                  | 19.7            |
| Average Overall B-factor (Å <sup>2</sup> )                                                | 13.4/15.2        | 27.5/26.9                 | 16.8/15.0                  | 18.7/20.0                  | 21.2/23.3                  | 21.8            |
| Number of ion pairs (≤4Å cutoff)                                                          | 26/26            | 27/27                     | 27/23                      | 23/23                      | 22/25                      | 23              |
| Number of hydrogen bonds                                                                  | 123.4/126.5      | 120.8/122.6               | 122.3/125.8                | 126.1/126.2                | 123.3/123.4                | 126.9           |
| Conditional Hydrophobic Accessible<br>Surface Area (Å <sup>2</sup> ) (CHASA) <sup>a</sup> | 4120/4135        | 4063/4277                 | 4117/4103                  | 4077/4112                  | 4147/4036                  | 4229            |
| r.m.s.d. relative to AK <sub>BSUB</sub> (Å)                                               | 0.71/0.60        | 0.72/0.63                 | 0.68/0.64                  | 0.71/0.64                  | 0.73/0.70                  | 0.49            |

<sup>a</sup> reference(3).

PDB entries used for comparative analyses are AK<sub>BSUB</sub> (1P3J) (1), AK<sub>BSUB</sub> Q199R - (2EU8) (4) and *Geobacillus stearothermophilus* AK (1ZIO) (5). Structures were aligned with O(6) or COOT using all C $\alpha$  carbon positions. For determination of ion pairs using the program WHATIF two oppositely charged residues were included if their closest oppositely charged atoms were within a 4.0 Å cutoff(7). Carboxylic oxygen atoms of Asp, Glu and the C-terminal residue were considered as negatively-charged atoms; while amino nitrogen atoms of Arg, Lys, His and the N-terminal residue were treated as positively-charged atoms. Hydrogen bonds were estimated using the HB2 options in WHAT IF were used to define hydrogen bonds(7). In HB2, the total hydrogen bonding energy is optimized to find the optimal positions for all hydrogen atoms simultaneously, and hydrogen bonds are determined from the

donor/acceptor types, the H-acceptor distance, the donor-H-acceptor angle and the position of the hydrogen with respect to the acceptor. The conditional hydrophobic accessible surface area (CHASA) was determined (3). All figures with molecular structures were generated using CCP4MG or PyMOL(8-10).

**Supplementary Table 3. Hydrogen isotope exchange rate of AK<sub>BSUB</sub> mutants.**

| Protein                        | K <sub>1</sub> [min <sup>-1</sup> ] | K <sub>2</sub> [min <sup>-1</sup> ] |
|--------------------------------|-------------------------------------|-------------------------------------|
| <i>B. subtilis</i> WT          | 0.129±0.004                         | 0.005±0.001                         |
| AK <sub>BSUB</sub> Q199R       | 0.127±0.02                          | 0.004±0.0006                        |
| AK <sub>BSUB</sub> Q199R/G213E | 0.140±0.002                         | 0.007±0.001                         |
| AK <sub>BSUB</sub> Q199R/T179I | 0.133±0.006                         | 0.004±0.001                         |
| AK <sub>BSUB</sub> Q199R/G214R | 0.127±0.002                         | 0.007±0.001                         |
| AK <sub>BSUB</sub> Q199R/A193V | 0.208±0.04                          | 0.006±0.0007                        |
| AK <sub>BSUB</sub> Q199R/Q16L  | 0.137±0.0002                        | 0.005±0.0005                        |
| <i>B. subtilis</i> WT + AP5A   | 0.100±0.002                         | 0.004±0.0006                        |



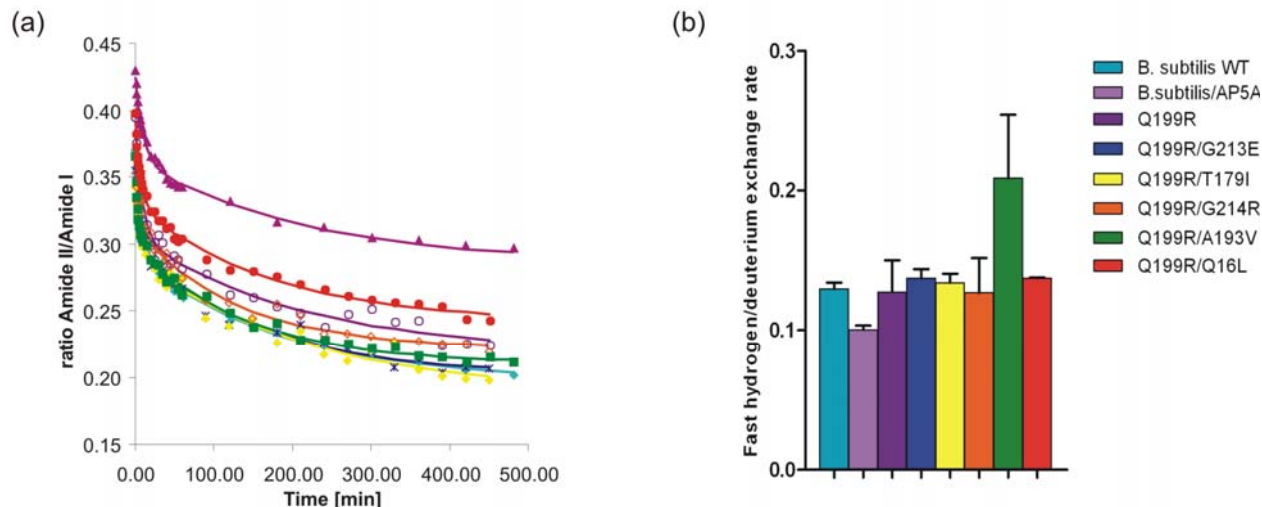

**Supplementary Figure 2.** Fourier-transformed infrared (FT-IR) spectroscopy shows a faster rate of deuterium exchange for AK<sub>BSUB</sub>Q199R/A193V than the other adaptive mutations to AK<sub>BSUB</sub>. (a) Change in the ratio of Amide II to Amide I peaks for AK<sub>BSUB</sub> mutants over time during hydrogen/deuterium exchange monitored by FT-IR. The line represents the best fit of double-exponential decay curve during the time course of the experiment (7.5-8 hours at 22 °C). (b) The difference in the fast hydrogen/deuterium exchange rate of the AK mutants at 22 °C with the error bar showing the standard deviation.

FT-IR Studies - Hydrogen isotope exchange to probe protein flexibility. Fourier-transformed infrared (FT-IR) spectroscopy was used to provide a measure of the global hydrogen exchange rate of the AK<sub>BSUB</sub> mutants at 22 °C. The absorption associated with Amide I arose from the in-plane C=O stretching vibration weakly coupled with C-N stretching and in-plane N-H bending. The Amide II is primary N-H bending strongly coupled with C-N stretching(11, 12). The Amide I band is slightly influenced during H/D exchange, which makes it a good internal standard for protein concentration(13). Thus, for each spectrum, the ratio of the amide II peak (centered at approximately 1550 cm<sup>-1</sup>) to the amide I peak (centered at approximately 1655 cm<sup>-1</sup>) was determined (Supplementary Figure 2). The change in this ratio with time after addition of D<sub>2</sub>O is a convenient measure for the estimation of the rate of exchange of internal amide hydrogens with solvent deuterons. The resultant decay plots were fitted with a two-exponential model to produce

a smoothed curve (Supplementary Figure 2 and Table 3). The exponents of these curves were taken as rate constants which represent the major population of amide hydrogens exchanging during the time course of the experiment (14, 15). FT-IR data reveal that the rate constant for fast and slow exchanging amide protons does not substantially change for all AK mutants with the exception of AK<sub>BSUB</sub> Q199R/A193V. AK<sub>BSUB</sub> Q199R/A193V has a 2-fold change in the fast exchange rate consistent with the protein folding kinetics described previously. As a control for the sensitivity of the FT-IR experiment in sensing a potential change in AK dynamics we measured the exchange rate of wild type AK<sub>BSUB</sub> bound to the inhibitor Ap5A that would stabilize the closed conformation of the LID domain of AK and presumably reduce the overall exchange rate (16, 17). In the presence of Ap5A, the exchange did decrease modestly and suggests that the almost two-fold change in exchange rate for AK<sub>BSUB</sub> Q199R/A193V is consistent with a more dynamic structure.

The infrared spectra were measured with a Nicolet Nexus 470 (Thermo Electron-Nicolet, Waltham, MA) Fourier transform infrared spectrometer. The sample chamber of the spectrophotometer was purged constantly with nitrogen gas for at least 24 hours prior to the experiments and during data collection. Protein samples for H/D exchange experiments were dialyzed in 10 mM sodium phosphate buffer solution, pH 7.0 and lyophilized above liquid nitrogen to dryness. Lyophilized samples were reconstituted by dissolving in D<sub>2</sub>O water to produce a 1 mM protein solution in 10 mM sodium phosphate buffer and were injected immediately into a CaF<sub>2</sub> cell with a 40 μm Teflon spacer. Spectra were recorded at 1, 2, 3, 4, 5, 6, 7, 8, 9, 10, 20, 30, 40, 50, 60 min after initiating the H/D exchange and every 30 min thereafter up to 450 min. A total 34 scans with a resolution of 2 cm<sup>-1</sup> were collected and averaged for each time interval. The water vapor background spectrum was subtracted from each

sample spectrum. Spectra collection, averaging and subtraction were performed using the OMNIC software (version 7.1a, Thermo Electron Corporation)

## **Additional Materials and Methods**

Protein Expression and Purification – Site-directed mutagenesis of wild type *B. subtilis* adenylate kinase (Sequence ID Z99104.2) in the pET-11a vector (Novagen, NJ, USA) was performed using the Stratagene QuikChange™ Site-Directed Mutagenesis Kit (Stratagene, La Jolla, CA, USA) as per the manufacturer's protocol. The plasmid containing the wild type *B. subtilis adk* gene was the generous gift of Dr. G. N. Phillips (U. Wisconsin at Madison). All clones were confirmed by DNA sequencing. Proteins were overexpressed and purified from *E. coli* as previously described (4).

## **REFERENCES**

1. Bae, E., and G. N. Phillips, Jr. 2004. Structures and analysis of highly homologous psychrophilic, mesophilic, and thermophilic adenylate kinases. *J Biol Chem* 279:28202-28208.
2. Laskowski, R. A., M. W. MacArthur, D. S. Moss, and J. M. Thornton. 1993. PROCHECK: a program to check the stereochemical quality of protein structures. *J. Appl. Crystallogr.* 26:283-291.
3. Fleming, P. J., N. C. Fitzkee, M. Mezei, R. Srinivasan, and G. D. Rose. 2005. A novel method reveals that solvent water favors polyproline II over beta-strand conformation in peptides and unfolded proteins: conditional hydrophobic accessible surface area (CHASA). *Protein Sci* 14:111-118.
4. Counago, R., S. Chen, and Y. Shamoo. 2006. In vivo molecular evolution reveals biophysical origins of organismal fitness. *Mol Cell* 22:441-449.
5. Berry, M. B., and G. N. Phillips. 1998. Crystal Structures of Bacillus stearothermophilus Adenylate Kinase With Bound  $Ap_5A$ ,  $Mg^{2+}$   $Ap_5A$ , and  $Mn^{2+}$  Reveal an Intermediate Lid Position and Six Coordinate Octahedral Geometry for Bound  $Mg^{2+}$  and  $Mn^{2+}$ . *Prot. Struct. Func. Genet.* 32:276-288.
6. Jones, T. A., J.-. Zou, Y., S. W. Cowan, and M. O. Kjeldgaard. 1991. O. *Acta Crystallogr A* 47:110-119.
7. Vriend, G. 1990. WHAT IF: a molecular modeling and drug design program. *J Mol Graph* 8:52-56, 29.
8. Potterton, E., S. McNicholas, E. Krissinel, K. Cowtan, and M. Noble. 2002. The CCP4 molecular-graphics project. *Acta Crystallogr D Biol Crystallogr* 58:1955-1957.

9. Potterton, L., S. McNicholas, E. Krissinel, J. Gruber, K. Cowtan, P. Emsley, G. N. Murshudov, S. Cohen, A. Perrakis, and M. Noble. 2004. Developments in the CCP4 molecular-graphics project. *Acta Crystallogr D Biol Crystallogr* 60:2288-2294.
10. DeLano, W. L. 2002. The PyMol Molecular Graphics System. DeLano Scientific, San Carlos.
11. Susi, H. 1972. Infrared spectroscopy--conformation. *Methods Enzymol* 26 PtC:455-472.
12. Haris, I. P., and F. Severcan. 1999. FTIR spectroscopic characterisation of protein structure in aqueous and non-aqueous media. *J. Mol. Catalysis B: Enzymatic* 7:207-221.
13. Ottesen, M. 1971. Methods for measurement of hydrogen isotope exchange in globular proteins. *Methods Biochem Anal* 20:135-168.
14. Fields, A. P., Y. Kim, F. J. Carpenter, and N. G. Somero. 2002. Temperature adaptation in *Gillichthys* (Teleost: Gobiidae) A<sub>4</sub>-lactate dehydrogenases: identical primary structures produce subtly different conformations. *J. Exper. Biol.* 205:1293-1303.
15. Zavodszky, P., J. Kardos, and G. A. Petsko. 1998. Adjustment of conformational flexibility is a key event in the thermal adaptation of proteins. *Proc. Natl. Acad. U.S.A.* 95:7406-7411.
16. Shapiro, Y. E., M. A. Sinev, E. V. Sineva, V. Tugarinov, and E. Meirovitch. 2000. Backbone dynamics of escherichia coli adenylate kinase at the extreme stages of the catalytic cycle studied by (15)N NMR relaxation. *Biochemistry* 39:6634-6644.
17. Shapiro, Y. E., E. Kahana, V. Tugarinov, Z. Liang, J. H. Freed, and E. Meirovitch. 2002. Domain flexibility in ligand-free and inhibitor-bound Escherichia coli adenylate kinase based on a mode-coupling analysis of 15N spin relaxation. *Biochemistry* 41:6271-6281.
